# Supplementary material for: High-Throughput Ligand Discovery Reveals a Sitewise Gradient of Diversity in Broadly Evolved Hydrophilic Fibronectin Domains
Source: PubMed Central journal article supplement (PMC4575168; doi:10.1371/journal.pone.0138956), 2015-09-18
Supplement: pone.0138956.s005.pdf [file pone.0138956.s005.pdf]

S2 Table. Oligonucleotide DNA sequences used for constructing generation two library. Sequences are composed of standard nucleotides (ACGT), degenerate nucleotides (RYMKSWHBDN), and a specialty codon mix (xyz) which uses the following nucleotide frequencies : 20% A, 15% C, 25% G, and 40% T at site 1, 50% A, 25% C, 15% G, and 10% T at site 2, and 0% A, 45% C, 10% G, and 45% T at site 3. Oligos are arranged by loop (BC, DE, FG), loop specific sublibraries, and amino acid length of the diversified region within the loop.

| Loop/Sublib/Len (AA) | Oligo Sequence                                                         |
|----------------------|------------------------------------------------------------------------|
| BC/a/10              | ACTCTCTGACTATTTCTTGGGACGCACCAxyzxyzxyzDCTxyzGGATACCGTATCACCTACGGCGAAAC |
| BC/b/10              | ACTCTCTGACTATTTCTTGGGACDMTYMTxyzxyzxyzDCTxyzTATTACCGTATCACCTACGGCGAAAC |
| BC/c/10              | ACTCTCTGACTATTTCTTGGGACGCACCAxyzxyzxyzDCTxyzGGATACCGTATCACCTACGGCGAAAC |
| BC/d/10              | ACTCTCTGACTATTTCTTGGGACDMTYMTxyzxyzxyzDCTxyzTATTACCGTATCACCTACGGCGAAAC |
| BC/e/10              | ACTCTCTGACTATTTCTTGGGACGCACCAxyzxyzxyzDCTxyzGGATACCGTATCACCTACGGCGAAAC |
| BC/f/10              | ACTCTCTGACTATTTCTTGGGACDMTYMTxyzxyzxyzDCTxyzTATTACCGTATCACCTACGGCGAAAC |
| BC/g/10              | ACTCTCTGACTATTTCTTGGGACGCACCAxyzxyzxyzDCTxyzGGATACCGTATCACCTACGGCGAAAC |
| BC/h/10              | ACTCTCTGACTATTTCTTGGGACDMTYMTxyzxyzxyzDCTxyzTATTACCGTATCACCTACGGCGAAAC |
| BC/a/9               | ACTCTCTGACTATTTCTTGGGACGCACCAxyzxyzxyzDCTxyzGGATACCGTATCACCTACGGCGAAAC |
| BC/b/9               | ACTCTCTGACTATTTCTTGGGACDMTYMTxyzxyzxyzDCTxyzTATTACCGTATCACCTACGGCGAAAC |
| BC/c/9               | ACTCTCTGACTATTTCTTGGGACGCACCAxyzxyzxyzDCTxyzGGATACCGTATCACCTACGGCGAAAC |
| BC/d/9               | ACTCTCTGACTATTTCTTGGGACDMTYMTxyzxyzxyzDCTxyzTATTACCGTATCACCTACGGCGAAAC |
| BC/e/9               | ACTCTCTGACTATTTCTTGGGACGCACCAxyzxyzxyzDCTxyzGGATACCGTATCACCTACGGCGAAAC |
| BC/f/9               | ACTCTCTGACTATTTCTTGGGACDMTYMTxyzxyzxyzDCTxyzTATTACCGTATCACCTACGGCGAAAC |
| BC/g/9               | ACTCTCTGACTATTTCTTGGGACGCACCAxyzxyzxyzDCTxyzGGATACCGTATCACCTACGGCGAAAC |
| BC/h/9               | ACTCTCTGACTATTTCTTGGGACDMTYMTxyzxyzxyzDCTxyzTATTACCGTATCACCTACGGCGAAAC |
| BC/a/8               | ACTCTCTGACTATTTCTTGGGACGCACCAxyzxyzDCTxyzGGATACCGTATCACCTACGGCGAAAC    |
| BC/b/8               | ACTCTCTGACTATTTCTTGGGACDMTYMTxyzxyzDCTxyzTATTACCGTATCACCTACGGCGAAAC    |
| BC/c/8               | ACTCTCTGACTATTTCTTGGGACGCACCAxyzxyzDCTxyzGGATACCGTATCACCTACGGCGAAAC    |

BC/d/8 ACTCTCTGACTATTTCTTGGGACDMTYMTxyzxyzDCTxyzTATTACCGTATCACCTACGGCGAAAC

BC/e/8 ACTCTCTGACTATTTCTTGGGACGCACCAxyzxyzDCTxyzGGATACCGTATCACCTACGGCGAAAC

BC/f/8 ACTCTCTGACTATTTCTTGGGACDMTYMTxyzxyzDCTxyzTATTACCGTATCACCTACGGCGAAAC

BC/g/8 ACTCTCTGACTATTTCTTGGGACGCACCAxyzxyzDCTxyzGGATACCGTATCACCTACGGCGAAAC

BC/h/8 ACTCTCTGACTATTTCTTGGGACDMTYMTxyzxyzDCTxyzTATTACCGTATCACCTACGGCGAAAC

DE/a/5 CGAGCCAGGAATTCACTGTCCGGAWMTWMTWMTWMTGCGACCATCAGCGGTCTGAAAC

DE/a/4 CGAGCCAGGAATTCACTGTCCGGAWMTWMTWMTGCGACCATCAGCGGTCTGAAAC

FG/a/11 CATTACCGTGACGCTGTARSCDVTxyzRRCxyzxyzxyzxyzTCAAACCAATCAGCATCAATTATCGCAC

FG/a/10 CATTACCGTGACGCTGTARSCDVTxyzRRCxyzxyzxyzxyzTCAAACCAATCAGCATCAATTATCGCAC

FG/a/9 CATTACCGTGACGCTGTARSCDVTxyzRRCxyzxyzxyzTCAAACCAATCAGCATCAATTATCGCAC

FG/a/8 CATTACCGTGACGCTGTARSCDVTxyzRRCxyzxyzTCAAACCAATCAGCATCAATTATCGCAC

FG/a/7 CATTACCGTGACGCTGTARSCDVTxyzRRCxyzTCAAACCAATCAGCATCAATTATCGCAC
