# Supplementary material for: High-Throughput Ligand Discovery Reveals a Sitewise Gradient of Diversity in Broadly Evolved Hydrophilic Fibronectin Domains
Source: PubMed Central journal article supplement (PMC4575168; doi:10.1371/journal.pone.0138956), 2015-09-18
Supplement: pone.0138956.s006.pdf [file pone.0138956.s006.pdf]

**S3 Table. Correlative Parametric Analysis of Amino Acid Distributions - Input Matrices.**

Library design can be guided by information regarding each position's mutational tolerance and naturally evolved sequence to reduce the prevalence of overly destabilizing mutations as well as identifying structurally stabilizing mutations. Additionally, the chemical diversity found at the interfaces of well characterized natural binders, such as the complementarity determining regions (CDR) of antibodies, can be applied to protein scaffolds to accommodate for strong binding interactions. Here, a model for library design was built based on a linear combination of (A) computational stability, (B) natural homolog sequence frequency, and (C) CDR diversity input matrices. These three elements were weighted based on the (D) target exposure (i.e. proximity to the binding interface) and solvent exposed surface area (i.e. orientation and packing) of each site.

A. Computational sitewise assessment of changes in stability ( $\Delta\Delta G$ , kcal/mol) upon mutation. Conducted in FoldX.

|   | D23    | A24    | P25    | A26    | V27    | T28    | V29    | R30    | Y31    | G52   | S53    | K54    | S55    | T56    |
|---|--------|--------|--------|--------|--------|--------|--------|--------|--------|-------|--------|--------|--------|--------|
| A | 0.34   | -      | 0.28   | -      | (0.31) | (0.30) | 1.67   | 0.23   | 0.06   | 1.70  | (0.09) | 0.73   | (0.23) | 0.26   |
| C | 0.37   | 0.29   | 0.42   | 0.01   | (0.24) | (0.21) | 1.28   | 0.86   | (0.15) | 3.38  | (0.22) | 0.86   | 0.07   | 0.03   |
| D | -      | 0.73   | 0.72   | (0.08) | (0.03) | (0.34) | 3.28   | 0.65   | 1.51   | 5.39  | 0.00   | 0.93   | (0.00) | 0.97   |
| E | 0.18   | 0.64   | 0.56   | (0.25) | (0.25) | (0.48) | 3.24   | 0.39   | 0.29   | 5.24  | (0.48) | 0.55   | (0.02) | (0.13) |
| F | (0.22) | 0.51   | 0.75   | (0.50) | (0.16) | (0.44) | 4.17   | 0.18   | (0.33) | 6.16  | (0.28) | (0.06) | (0.36) | (0.16) |
| G | 1.11   | 0.35   | 0.15   | 0.21   | 0.02   | (0.33) | 2.54   | 0.76   | 0.34   | -     | 0.20   | 1.70   | 0.05   | 0.75   |
| H | 0.59   | 0.73   | 1.50   | 0.10   | 0.33   | (0.15) | 4.09   | 0.91   | 0.75   | 6.14  | 0.14   | 0.96   | 0.03   | 0.54   |
| I | 0.30   | 0.98   | 0.64   | (0.07) | (0.07) | (0.01) | (0.31) | 0.81   | 0.40   | 11.73 | (0.40) | 0.95   | 0.16   | (0.03) |
| K | (0.04) | 0.13   | 0.49   | (0.37) | (0.38) | (0.57) | 3.01   | (0.00) | (0.46) | 4.76  | (0.73) | -      | (0.56) | (0.56) |
| L | (0.24) | 0.38   | 0.02   | (0.47) | (0.56) | (0.48) | 0.82   | (0.06) | (0.47) | 6.31  | (0.71) | (0.31) | (0.38) | (0.25) |
| M | (0.19) | 0.04   | (0.47) | (0.57) | (0.58) | (0.53) | 0.81   | 0.07   | (0.84) | 4.41  | (0.78) | (0.32) | (0.45) | (0.91) |
| N | 0.35   | 0.32   | 0.52   | (0.07) | (0.24) | (0.30) | 2.13   | 0.64   | 0.65   | 4.25  | (0.04) | 0.75   | (0.54) | 0.63   |
| P | 2.35   | (0.59) | -      | (0.08) | 1.28   | (0.06) | 3.89   | 2.73   | 2.37   | 3.52  | 0.28   | 3.58   | (0.08) | 1.71   |
| Q | 0.18   | 0.40   | 0.49   | (0.26) | (0.25) | (0.35) | 3.04   | 0.11   | 0.06   | 5.13  | (0.39) | 0.49   | (0.29) | (0.10) |
| R | 0.12   | 0.16   | 0.74   | (0.32) | (0.22) | (0.51) | 4.14   | -      | (0.40) | 5.01  | (0.53) | (0.12) | (0.83) | (0.51) |
| S | 0.62   | 0.24   | 0.19   | 0.19   | (0.27) | (0.23) | 2.43   | 0.79   | 0.03   | 3.21  | -      | 0.84   | -      | (0.17) |
| T | 0.71   | 0.73   | 0.61   | 0.37   | (0.18) | -      | 1.16   | 1.12   | 1.16   | 8.01  | 0.32   | 1.23   | 0.70   | -      |
| V | 0.62   | 0.82   | 0.71   | 0.20   | -      | 0.12   | -      | 0.90   | 0.86   | 8.15  | 0.03   | 1.25   | 0.40   | 0.07   |
| W | 0.17   | 1.03   | 1.87   | (0.50) | 0.69   | (0.19) | 7.81   | 0.49   | 0.45   | 7.10  | (0.17) | 0.03   | (0.08) | (0.14) |
| Y | (0.12) | 0.45   | 1.36   | (0.45) | 0.01   | (0.39) | 6.36   | 0.29   | -      | 6.31  | (0.27) | 0.00   | (0.29) | (0.10) |

|   | T76    | G77    | R78    | G79    | D80    | S81    | P82    | A83    | S84    | S85    | K86    |
|---|--------|--------|--------|--------|--------|--------|--------|--------|--------|--------|--------|
| A | (0.07) | 0.46   | 0.45   | 0.37   | 0.02   | (0.04) | (0.70) | (0.15) | (0.34) | (0.06) | 0.34   |
| C | (0.07) | 0.38   | 0.68   | 0.44   | 0.04   | 0.06   | (0.65) | 0.04   | (0.20) | (0.13) | 0.32   |
| D | 1.17   | 0.68   | 0.60   | 0.15   | -      | (0.03) | (0.61) | (0.01) | 0.05   | (0.15) | 0.51   |
| E | 0.58   | 0.72   | 0.17   | 0.27   | (0.15) | (0.12) | (0.79) | (0.04) | 0.02   | (0.12) | 0.23   |
| F | (0.69) | (0.14) | 0.03   | 0.11   | (0.24) | (0.30) | (1.13) | (0.30) | (0.36) | (0.23) | (0.36) |
| G | 0.45   | -      | 0.70   | -      | (0.39) | (0.51) | (0.60) | 0.14   | 0.17   | 0.41   | 0.19   |
| H | 0.97   | 0.91   | 0.44   | 0.40   | 0.13   | 0.27   | (0.58) | 0.04   | 0.31   | 0.49   | 0.31   |
| I | (0.98) | 0.68   | 0.47   | 1.00   | 0.62   | 0.30   | (0.92) | (0.14) | (0.47) | 0.03   | 0.79   |
| K | (0.11) | 0.15   | (0.02) | (0.15) | (0.44) | (0.29) | (1.08) | (0.38) | (0.38) | (0.17) | (0.06) |
| L | (1.16) | 0.06   | (0.09) | 0.01   | (0.27) | (0.25) | (1.03) | (0.39) | (0.95) | (0.49) | (0.10) |
| M | (1.37) | (0.27) | 0.05   | 0.14   | (0.29) | (0.23) | (1.06) | (0.45) | (1.28) | (0.63) | (0.33) |
| N | 0.38   | 0.24   | 0.45   | 0.12   | (0.14) | (0.09) | (0.66) | (0.10) | (0.08) | (0.17) | 0.41   |
| P | 1.30   | 1.43   | 0.64   | 2.26   | 1.17   | 1.70   | -      | 0.53   | 2.03   | 0.40   | 1.32   |
| Q | 0.18   | 0.57   | 0.03   | 0.20   | (0.13) | (0.20) | (0.93) | (0.29) | (0.31) | (0.16) | 0.14   |
| R | 0.37   | 0.18   | -      | 0.09   | (0.23) | (0.22) | (0.76) | (0.23) | (0.55) | (0.09) | (0.00) |
| S | 0.26   | 0.34   | 0.57   | 0.41   | (0.18) | -      | (0.36) | 0.00   | 0.02   | (0.08) | 0.38   |
| T | -      | 0.74   | 0.69   | 0.84   | 0.40   | 0.33   | (0.38) | 0.10   | 0.02   | 0.01   | 0.86   |
| V | (0.55) | 0.99   | 0.64   | 0.98   | 0.54   | 0.43   | (0.57) | 0.04   | (0.19) | 0.04   | 0.92   |
| W | 1.10   | 0.52   | 0.45   | 0.32   | (0.08) | 0.07   | (0.89) | (0.16) | (0.19) | 0.29   | (0.20) |
| Y | 0.03   | 0.03   | 0.10   | 0.19   | (0.17) | (0.22) | (1.07) | (0.24) | (0.18) | 0.06   | (0.23) |

B. Natural sequence frequency for the tenth type III domain of human fibronectin: pfam database summary. Below the full amino acid table, the four most frequent residues at each site are listed.

|                      | V           | S           | D           | V           | P           | R           | D           | L           | E           | V           | V           | A           | A           | T           | P           | T           | S           | L           | L           |
|----------------------|-------------|-------------|-------------|-------------|-------------|-------------|-------------|-------------|-------------|-------------|-------------|-------------|-------------|-------------|-------------|-------------|-------------|-------------|-------------|
|                      | 1           | 2           | 3           | 4           | 5           | 6           | 7           | 8           | 9           | 10          | 11          | 12          | 13          | 14          | 15          | 16          | 17          | 18          | 19          |
| A                    | 13.1%       | 12.6%       | 3.2%        | 28.6%       | 1.6%        | 4.5%        | 4.1%        | 2.1%        | 4.3%        | 15.0%       | 4.6%        | 11.2%       | 10.1%       | 2.0%        | 10.4%       | 1.7%        | 6.6%        | 11.2%       | 2.9%        |
| C                    | 0.5%        | -           | -           | 1.2%        | -           | -           | -           | -           | -           | 2.2%        | 0.7%        | 0.6%        | 0.7%        | -           | 0.6%        | 0.6%        | 1.0%        | 3.5%        | 0.5%        |
| D                    | 1.5%        | 0.8%        | 16.0%       | -           | 0.7%        | 1.0%        | 13.4%       | -           | 3.7%        | 0.9%        | 3.9%        | 15.8%       | 1.8%        | 4.3%        | 8.8%        | 13.9%       | 1.8%        | -           | 3.1%        |
| E                    | 3.5%        | 1.1%        | 9.6%        | 0.8%        | 0.8%        | 6.9%        | 6.2%        | -           | 13.3%       | 2.2%        | 5.6%        | 11.8%       | 3.1%        | 2.7%        | 8.6%        | 5.5%        | 5.1%        | -           | 4.7%        |
| F                    | 0.8%        | -           | -           | 1.2%        | -           | 1.6%        | 0.8%        | 5.0%        | 1.1%        | 5.1%        | 1.9%        | 0.7%        | 0.9%        | 0.9%        | -           | 1.3%        | 1.2%        | 4.4%        | 2.5%        |
| G                    | 7.1%        | 22.2%       | 3.8%        | 3.0%        | 4.1%        | 8.8%        | 9.1%        | -           | 1.6%        | 2.1%        | 2.7%        | 6.7%        | 4.7%        | 7.2%        | 5.0%        | 2.9%        | 4.5%        | 0.6%        | 1.2%        |
| H                    | 0.6%        | -           | 1.6%        | -           | -           | 2.1%        | 1.9%        | -           | 4.8%        | -           | 1.5%        | 1.6%        | 1.1%        | 0.9%        | 2.3%        | 2.8%        | 1.9%        | -           | 2.4%        |
| I                    | 2.7%        | -           | 0.6%        | 7.4%        | 1.2%        | 2.1%        | 2.3%        | 11.8%       | 2.2%        | 11.7%       | 7.2%        | 1.4%        | 13.1%       | 0.8%        | 1.0%        | 1.0%        | -           | 21.8%       | 4.3%        |
| K                    | 1.8%        | 3.6%        | 4.0%        | 1.9%        | 0.6%        | 8.5%        | 5.1%        | -           | 11.5%       | 1.2%        | 4.7%        | 3.3%        | 3.9%        | 2.8%        | 11.7%       | 2.8%        | 3.3%        | -           | 5.4%        |
| L                    | 13.2%       | 0.6%        | 1.3%        | 7.6%        | 0.8%        | 5.2%        | 1.4%        | 42.5%       | 1.5%        | 8.4%        | 6.5%        | 1.5%        | 7.8%        | 1.8%        | 1.1%        | 1.1%        | -           | 19.6%       | 12.1%       |
| M                    | 3.9%        | -           | -           | 1.4%        | -           | 1.2%        | -           | 2.0%        | 0.9%        | 0.9%        | 1.4%        | 0.8%        | 1.3%        | 0.6%        | 0.9%        | -           | 0.6%        | 5.6%        | 2.0%        |
| N                    | 0.8%        | 2.0%        | 4.3%        | 0.8%        | 1.2%        | 1.8%        | 25.6%       | -           | 3.6%        | 1.0%        | 2.4%        | 11.1%       | 2.2%        | 8.5%        | 3.5%        | 11.8%       | 3.3%        | -           | 3.9%        |
| P                    | 24.0%       | 14.3%       | 41.0%       | 11.1%       | 81.9%       | 1.8%        | 6.4%        | 8.7%        | 2.0%        | 2.0%        | 1.0%        | 4.5%        | 2.9%        | 0.6%        | 12.9%       | -           | -           | -           | 0.6%        |
| Q                    | 2.1%        | 2.5%        | 5.1%        | 1.5%        | 0.9%        | 9.6%        | 3.4%        | 0.6%        | 9.2%        | 0.9%        | 2.3%        | 3.2%        | 2.4%        | 2.1%        | 3.3%        | 2.5%        | 3.5%        | -           | 4.8%        |
| R                    | 1.9%        | 2.4%        | 2.7%        | 1.1%        | -           | 14.0%       | 3.1%        | -           | 11.1%       | 0.9%        | 3.6%        | 3.0%        | 3.7%        | 3.4%        | 4.9%        | 5.2%        | 2.7%        | -           | 7.9%        |
| S                    | 4.3%        | 28.4%       | 3.1%        | 3.1%        | 2.0%        | 10.4%       | 9.0%        | 0.8%        | 9.2%        | 3.1%        | 14.0%       | 13.1%       | 6.8%        | 22.1%       | 16.2%       | 14.8%       | 45.8%       | -           | 9.8%        |
| T                    | 4.4%        | 7.3%        | 1.5%        | 5.2%        | 1.5%        | 12.4%       | 5.4%        | 1.7%        | 14.0%       | 5.2%        | 18.7%       | 5.2%        | 7.4%        | 35.6%       | 4.9%        | 27.6%       | 13.4%       | 0.9%        | 21.5%       |
| V                    | 11.6%       | 0.7%        | 1.4%        | 22.8%       | 1.1%        | 5.7%        | 1.5%        | 21.7%       | 4.6%        | 34.8%       | 14.7%       | 3.3%        | 23.4%       | 1.5%        | 1.4%        | 2.6%        | 1.3%        | 28.7%       | 7.8%        |
| W                    | -           | -           | -           | -           | -           | -           | -           | -           | -           | 0.7%        | -           | 0.7%        | 1.3%        | 0.9%        | 0.8%        | -           | 1.1%        | 1.0%        | 1.2%        |
| Y                    | 1.9%        | -           | -           | 0.6%        | -           | 1.6%        | -           | -           | 0.7%        | 1.2%        | 2.2%        | 0.5%        | 1.1%        | 0.8%        | 1.2%        | 1.1%        | 1.9%        | -           | 1.4%        |
| <b>Most Frequent</b> |             |             |             |             |             |             |             |             |             |             |             |             |             |             |             |             |             |             |             |
| 1                    | P<br>(0.24) | S<br>(0.28) | P<br>(0.41) | A<br>(0.29) | P<br>(0.82) | R<br>(0.14) | N<br>(0.26) | L<br>(0.43) | T<br>(0.14) | V<br>(0.35) | T<br>(0.19) | D<br>(0.16) | V<br>(0.23) | T<br>(0.36) | S<br>(0.16) | T<br>(0.28) | S<br>(0.46) | V<br>(0.29) | T<br>(0.21) |
| 2                    | L<br>(0.13) | G<br>(0.22) | D<br>(0.16) | V<br>(0.23) | G<br>(0.04) | T<br>(0.12) | D<br>(0.13) | V<br>(0.22) | E<br>(0.13) | A<br>(0.15) | V<br>(0.15) | S<br>(0.13) | I<br>(0.13) | S<br>(0.22) | P<br>(0.13) | S<br>(0.15) | T<br>(0.13) | I<br>(0.22) | L<br>(0.12) |
| 3                    | A<br>(0.13) | P<br>(0.14) | E<br>(0.1)  | P<br>(0.11) | S<br>(0.02) | S<br>(0.1)  | G<br>(0.09) | I<br>(0.12) | K<br>(0.12) | I<br>(0.12) | S<br>(0.14) | E<br>(0.12) | A<br>(0.1)  | N<br>(0.08) | K<br>(0.12) | D<br>(0.14) | A<br>(0.07) | L<br>(0.2)  | S<br>(0.1)  |
| 4                    | V<br>(0.12) | A<br>(0.13) | Q<br>(0.05) | L<br>(0.08) | A<br>(0.02) | Q<br>(0.1)  | S<br>(0.09) | P<br>(0.09) | R<br>(0.11) | L<br>(0.08) | I<br>(0.07) | A<br>(0.11) | L<br>(0.08) | G<br>(0.07) | A<br>(0.1)  | N<br>(0.12) | E<br>(0.05) | A<br>(0.11) | R<br>(0.08) |

|   | I<br>20 | S<br>21 | W<br>22 | D<br>23 | A<br>24 | P<br>25 | A<br>26 | V<br>27 | T<br>28 | V<br>29 | R<br>30 | Y<br>31 | Y<br>32 | R<br>33 | I<br>34 | T<br>35 | Y<br>36 | G<br>37 | E<br>38 |
|---|---------|---------|---------|---------|---------|---------|---------|---------|---------|---------|---------|---------|---------|---------|---------|---------|---------|---------|---------|
| A | 1.9%    | 6.8%    | -       | 2.6%    | 18.2%   | 2.2%    | 15.0%   | 9.2%    | 4.5%    | 6.9%    | 2.0%    | 3.9%    | 3.1%    | 2.1%    | 1.4%    | 2.9%    | 1.3%    | 4.8%    | 3.0%    |
| C | -       | 1.0%    | -       | -       | -       | -       | -       | 1.8%    | -       | 0.7%    | -       | 0.7%    | 1.0%    | -       | -       | 0.8%    | 1.8%    | 1.8%    | 0.7%    |
| D | -       | 1.3%    | -       | 16.5%   | 2.1%    | 3.7%    | 4.4%    | 6.4%    | 17.5%   | 6.2%    | 10.9%   | 2.2%    | 2.2%    | 4.2%    | -       | 3.0%    | 0.6%    | 2.5%    | 7.2%    |
| E | -       | 5.8%    | 0.5%    | 15.2%   | 6.2%    | 1.6%    | 9.4%    | 4.8%    | 5.6%    | 2.1%    | 6.3%    | 4.4%    | 2.9%    | 9.6%    | 0.6%    | 13.6%   | 1.6%    | 2.3%    | 23.9%   |
| F | 2.1%    | 0.6%    | 1.6%    | -       | -       | -       | -       | 3.0%    | 0.6%    | 4.0%    | -       | 2.9%    | 8.9%    | 1.2%    | 1.0%    | 2.0%    | 6.0%    | 1.6%    | 0.9%    |
| G | -       | 2.4%    | 0.5%    | 3.0%    | 4.2%    | 3.1%    | 13.5%   | 11.1%   | 4.8%    | 11.5%   | 18.1%   | 30.7%   | 4.5%    | 2.9%    | 1.3%    | 5.9%    | 1.1%    | 13.5%   | -       |
| H | -       | 2.7%    | -       | 1.8%    | 1.5%    | 0.7%    | 1.2%    | 2.1%    | 1.6%    | 0.7%    | 1.9%    | 5.3%    | 1.4%    | 1.7%    | -       | 1.5%    | 2.2%    | 2.4%    | 1.6%    |
| I | 16.1%   | 1.0%    | -       | 0.8%    | 2.3%    | -       | 2.2%    | 6.5%    | 1.9%    | 24.3%   | 1.7%    | 3.0%    | 3.7%    | 10.9%   | 37.3%   | 2.7%    | 3.4%    | 5.1%    | 4.0%    |
| K | -       | 6.3%    | -       | 8.9%    | 8.5%    | 1.6%    | 4.9%    | 3.0%    | 3.3%    | 0.6%    | 6.3%    | 3.4%    | 1.6%    | 9.5%    | 0.7%    | 4.6%    | 3.4%    | 8.8%    | 7.3%    |
| L | 44.5%   | 1.3%    | 0.7%    | 2.1%    | 2.6%    | 0.8%    | 4.1%    | 8.4%    | 1.8%    | 6.8%    | 5.1%    | 3.5%    | 2.3%    | 6.0%    | 17.6%   | 5.1%    | 5.4%    | 3.2%    | 4.4%    |
| M | 1.3%    | 1.3%    | -       | 0.6%    | 1.1%    | -       | 0.6%    | 1.6%    | -       | 0.9%    | 0.5%    | 1.0%    | -       | 1.0%    | 1.1%    | 0.9%    | 1.8%    | 1.3%    | 0.7%    |
| N | -       | 4.7%    | -       | 8.4%    | 2.2%    | 2.4%    | 5.3%    | 5.1%    | 12.1%   | 3.2%    | 5.4%    | 6.6%    | 1.7%    | 3.9%    | 0.5%    | 4.1%    | 0.9%    | 5.0%    | 2.2%    |
| P | 0.7%    | 1.1%    | 0.7%    | 3.7%    | 22.6%   | 73.0%   | 6.8%    | 5.6%    | 9.9%    | 3.0%    | 1.3%    | 1.2%    | 3.5%    | 3.7%    | 0.6%    | 0.8%    | -       | 1.4%    | 8.5%    |
| Q | -       | 6.5%    | -       | 7.8%    | 2.5%    | 1.3%    | 4.3%    | 3.1%    | 3.7%    | 0.9%    | 6.8%    | 3.1%    | 1.2%    | 6.1%    | 0.6%    | 7.9%    | 2.1%    | 4.9%    | 5.3%    |
| R | -       | 6.0%    | -       | 3.8%    | 5.1%    | 0.6%    | 3.0%    | 2.3%    | 2.6%    | 0.6%    | 10.6%   | 3.1%    | 0.8%    | 15.5%   | -       | 5.7%    | 4.5%    | 12.2%   | 7.1%    |
| S | -       | 31.6%   | -       | 9.6%    | 8.4%    | 4.4%    | 13.9%   | 8.0%    | 14.7%   | 2.5%    | 7.4%    | 11.5%   | 6.5%    | 3.7%    | 0.6%    | 10.4%   | 0.9%    | 9.1%    | 3.8%    |
| T | 0.6%    | 16.1%   | -       | 12.7%   | 4.8%    | 1.4%    | 4.8%    | 4.0%    | 11.7%   | 2.7%    | 12.3%   | 1.9%    | 1.4%    | 5.8%    | 1.9%    | 17.6%   | 0.8%    | 5.5%    | 3.2%    |
| V | 29.7%   | 2.3%    | -       | 1.4%    | 6.6%    | 1.9%    | 4.9%    | 8.4%    | 2.1%    | 20.4%   | 2.0%    | 2.2%    | 3.3%    | 9.2%    | 31.6%   | 5.6%    | 4.6%    | 6.7%    | 8.2%    |
| W | 0.9%    | -       | 92.4%   | -       | -       | -       | -       | -       | -       | -       | -       | 0.9%    | 1.0%    | 0.6%    | -       | 0.5%    | 4.8%    | 2.0%    | 1.0%    |
| Y | -       | 0.8%    | 0.8%    | -       | -       | -       | 0.8%    | 5.2%    | 0.8%    | 1.4%    | 0.5%    | 8.4%    | 48.4%   | 2.4%    | 1.8%    | 4.3%    | 52.4%   | 5.7%    | 6.4%    |

**Most Frequent**

|   |             |             |             |             |             |             |             |             |             |             |             |             |             |             |             |             |             |             |             |
|---|-------------|-------------|-------------|-------------|-------------|-------------|-------------|-------------|-------------|-------------|-------------|-------------|-------------|-------------|-------------|-------------|-------------|-------------|-------------|
| 1 | L<br>(0.45) | S<br>(0.32) | W<br>(0.92) | D<br>(0.17) | P<br>(0.23) | P<br>(0.73) | A<br>(0.15) | G<br>(0.11) | D<br>(0.17) | I<br>(0.24) | G<br>(0.18) | G<br>(0.31) | Y<br>(0.48) | R<br>(0.15) | I<br>(0.37) | T<br>(0.18) | Y<br>(0.52) | G<br>(0.14) | E<br>(0.24) |
| 2 | V<br>(0.3)  | T<br>(0.16) | F<br>(0.02) | E<br>(0.15) | A<br>(0.18) | S<br>(0.04) | S<br>(0.14) | A<br>(0.09) | S<br>(0.15) | V<br>(0.2)  | T<br>(0.12) | S<br>(0.12) | F<br>(0.09) | I<br>(0.11) | V<br>(0.32) | E<br>(0.14) | F<br>(0.06) | R<br>(0.12) | P<br>(0.09) |
| 3 | I<br>(0.16) | A<br>(0.07) | Y<br>(0.01) | T<br>(0.13) | K<br>(0.09) | D<br>(0.04) | G<br>(0.14) | V<br>(0.08) | N<br>(0.12) | G<br>(0.11) | D<br>(0.11) | Y<br>(0.08) | S<br>(0.06) | E<br>(0.1)  | L<br>(0.18) | S<br>(0.1)  | L<br>(0.05) | S<br>(0.09) | V<br>(0.08) |
| 4 | F<br>(0.02) | Q<br>(0.07) | P<br>(0.01) | S<br>(0.1)  | S<br>(0.08) | G<br>(0.03) | E<br>(0.09) | L<br>(0.08) | T<br>(0.12) | A<br>(0.07) | R<br>(0.11) | N<br>(0.07) | G<br>(0.04) | K<br>(0.1)  | T<br>(0.02) | Q<br>(0.08) | W<br>(0.05) | K<br>(0.09) | K<br>(0.07) |

|   | T     | G     | G     | N     | S     | P     | V     | Q     | E     | F     | T     | V     | P     | G     | S     | K     | S     | T     | A     |
|---|-------|-------|-------|-------|-------|-------|-------|-------|-------|-------|-------|-------|-------|-------|-------|-------|-------|-------|-------|
|   | 39    | 40    | 41    | 42    | 43    | 44    | 45    | 46    | 47    | 48    | 49    | 50    | 51    | 52    | 53    | 54    | 55    | 56    | 57    |
| A | 6.3%  | 5.8%  | 6.1%  | 2.8%  | 6.5%  | 4.1%  | 6.5%  | 4.3%  | 7.4%  | 3.9%  | 4.9%  | 6.3%  | 5.4%  | 8.6%  | 6.5%  | 5.7%  | 4.3%  | 2.6%  | 16.7% |
| C | 1.6%  | 1.5%  | 1.1%  | 0.6%  | 1.5%  | -     | 1.0%  | 0.6%  | 1.3%  | 1.7%  | 1.5%  | 1.7%  | 0.7%  | 2.0%  | 1.2%  | -     | 2.8%  | 1.2%  | 4.4%  |
| D | 3.8%  | 9.9%  | 7.5%  | 13.3% | 6.2%  | 6.8%  | 2.2%  | 4.1%  | 8.0%  | 1.5%  | 4.9%  | 1.6%  | 7.6%  | 5.3%  | 7.8%  | 6.1%  | 4.8%  | 2.6%  | 1.4%  |
| E | 7.7%  | 5.0%  | 6.7%  | 12.4% | 6.7%  | 11.4% | 4.2%  | 8.7%  | 23.7% | 2.8%  | 5.4%  | 2.8%  | 7.7%  | 3.1%  | 5.3%  | 12.6% | 3.6%  | 9.0%  | 3.1%  |
| F | 1.6%  | 1.3%  | 1.1%  | 1.2%  | 1.0%  | 1.4%  | 3.3%  | 0.6%  | 0.5%  | 10.6% | 0.5%  | 1.6%  | 0.6%  | 0.8%  | 0.8%  | 0.8%  | 1.6%  | 3.0%  | 6.4%  |
| G | 0.7%  | 19.6% | 27.6% | 6.1%  | 9.7%  | 5.4%  | 2.6%  | 4.9%  | 2.9%  | 2.4%  | 3.1%  | 1.5%  | 3.6%  | 32.9% | 3.3%  | 2.2%  | 2.9%  | 1.6%  | 2.8%  |
| H | 0.9%  | 1.5%  | 1.2%  | 2.6%  | 1.5%  | 1.4%  | 0.6%  | 3.5%  | 2.1%  | 2.0%  | 1.4%  | 0.8%  | 1.7%  | 1.8%  | 2.6%  | 2.3%  | 1.8%  | 2.1%  | 4.2%  |
| I | 6.8%  | 3.3%  | 1.6%  | 1.8%  | 1.4%  | 2.2%  | 11.9% | 1.6%  | 1.4%  | 8.4%  | 2.8%  | 12.1% | 1.7%  | 2.8%  | 2.1%  | 2.2%  | 1.5%  | 2.3%  | 6.2%  |
| K | 8.4%  | 8.4%  | 5.6%  | 8.0%  | 7.4%  | 6.0%  | 2.7%  | 13.3% | 7.2%  | 2.9%  | 5.2%  | 2.6%  | 5.9%  | 3.9%  | 4.2%  | 15.5% | 2.6%  | 4.0%  | 3.4%  |
| L | 7.3%  | 4.0%  | 2.9%  | 2.8%  | 2.9%  | 2.8%  | 10.0% | 4.2%  | 1.5%  | 11.7% | 3.7%  | 11.2% | 2.2%  | 2.2%  | 2.7%  | 3.9%  | 5.2%  | 3.6%  | 5.1%  |
| M | 2.1%  | 1.4%  | 1.2%  | 1.3%  | 0.8%  | 0.7%  | 3.1%  | 1.5%  | 0.9%  | 2.9%  | 1.2%  | 1.7%  | 0.7%  | 0.6%  | 0.6%  | 1.0%  | 1.3%  | 1.2%  | 2.0%  |
| N | 2.8%  | 6.6%  | 2.8%  | 14.5% | 3.6%  | 2.7%  | 2.0%  | 4.7%  | 6.3%  | 3.4%  | 6.4%  | 1.9%  | 5.0%  | 5.7%  | 9.2%  | 4.8%  | 8.9%  | 5.1%  | 2.1%  |
| P | 2.9%  | 2.1%  | 2.7%  | 2.7%  | 1.3%  | 22.7% | 0.8%  | 2.0%  | 2.2%  | 0.9%  | 3.6%  | 0.7%  | 28.2% | 3.3%  | 3.8%  | 2.3%  | 3.0%  | 2.7%  | 2.1%  |
| Q | 2.6%  | 4.5%  | 3.5%  | 4.2%  | 5.2%  | 4.2%  | 1.2%  | 16.5% | 3.9%  | 2.0%  | 4.6%  | 1.4%  | 3.2%  | 1.6%  | 3.0%  | 9.5%  | 3.3%  | 4.1%  | 2.5%  |
| R | 5.5%  | 5.3%  | 7.4%  | 5.9%  | 6.9%  | 4.1%  | 4.2%  | 9.3%  | 6.4%  | 3.6%  | 6.7%  | 2.4%  | 3.3%  | 3.3%  | 4.0%  | 10.4% | 5.6%  | 5.5%  | 2.1%  |
| S | 9.2%  | 8.2%  | 9.1%  | 6.2%  | 18.8% | 6.9%  | 4.3%  | 7.1%  | 6.7%  | 3.3%  | 12.6% | 3.3%  | 8.4%  | 8.1%  | 18.9% | 4.8%  | 17.1% | 17.2% | 4.1%  |
| T | 14.9% | 3.3%  | 5.2%  | 6.5%  | 10.8% | 7.1%  | 8.9%  | 5.2%  | 8.1%  | 4.0%  | 23.6% | 6.9%  | 7.5%  | 5.8%  | 16.9% | 7.7%  | 24.0% | 23.3% | 5.5%  |
| V | 11.8% | 4.1%  | 2.7%  | 2.4%  | 3.7%  | 2.1%  | 21.5% | 2.2%  | 5.2%  | 14.5% | 5.9%  | 36.2% | 5.3%  | 5.5%  | 4.7%  | 5.0%  | 3.3%  | 4.5%  | 11.5% |
| W | 0.6%  | 1.1%  | 1.4%  | 1.3%  | 1.7%  | 6.2%  | 5.5%  | 3.1%  | 2.9%  | 8.9%  | 1.0%  | 1.1%  | -     | 1.9%  | 1.0%  | 1.9%  | 0.6%  | 2.1%  | 1.1%  |
| Y | 2.5%  | 3.3%  | 2.5%  | 3.4%  | 2.5%  | 1.5%  | 3.5%  | 2.4%  | 1.3%  | 8.7%  | 1.0%  | 2.2%  | 0.8%  | 0.8%  | 1.3%  | 0.9%  | 1.8%  | 2.3%  | 13.2% |

Most Frequent

|   |             |             |             |             |             |             |             |             |             |             |             |             |             |             |             |             |             |             |             |
|---|-------------|-------------|-------------|-------------|-------------|-------------|-------------|-------------|-------------|-------------|-------------|-------------|-------------|-------------|-------------|-------------|-------------|-------------|-------------|
| 1 | T<br>(0.15) | G<br>(0.2)  | G<br>(0.28) | N<br>(0.15) | S<br>(0.19) | P<br>(0.23) | V<br>(0.21) | Q<br>(0.16) | E<br>(0.24) | V<br>(0.14) | T<br>(0.24) | V<br>(0.36) | P<br>(0.28) | G<br>(0.33) | S<br>(0.19) | K<br>(0.15) | T<br>(0.24) | T<br>(0.23) | A<br>(0.17) |
| 2 | V<br>(0.12) | D<br>(0.1)  | S<br>(0.09) | D<br>(0.13) | T<br>(0.11) | E<br>(0.11) | I<br>(0.12) | K<br>(0.13) | T<br>(0.08) | L<br>(0.12) | S<br>(0.13) | I<br>(0.12) | S<br>(0.08) | A<br>(0.09) | T<br>(0.17) | E<br>(0.13) | S<br>(0.17) | S<br>(0.17) | Y<br>(0.13) |
| 3 | S<br>(0.09) | K<br>(0.08) | D<br>(0.07) | E<br>(0.12) | G<br>(0.1)  | T<br>(0.07) | L<br>(0.1)  | R<br>(0.09) | D<br>(0.08) | F<br>(0.11) | R<br>(0.07) | L<br>(0.11) | E<br>(0.08) | S<br>(0.08) | N<br>(0.09) | R<br>(0.1)  | N<br>(0.09) | E<br>(0.09) | V<br>(0.12) |
| 4 | K<br>(0.08) | S<br>(0.08) | R<br>(0.07) | K<br>(0.08) | K<br>(0.07) | S<br>(0.07) | T<br>(0.09) | E<br>(0.09) | A<br>(0.07) | W<br>(0.09) | N<br>(0.06) | T<br>(0.07) | D<br>(0.08) | T<br>(0.06) | D<br>(0.08) | Q<br>(0.1)  | R<br>(0.06) | R<br>(0.06) | F<br>(0.06) |

|   | T<br>58 | I<br>59 | S<br>60 | G<br>61 | L<br>62 | K<br>63 | P<br>64 | G<br>65 | V<br>66 | D<br>67 | Y<br>68 | T<br>69 | I<br>70 | T<br>71 | V<br>72 | Y<br>73 | A<br>74 | V<br>75 | T<br>76 |
|---|---------|---------|---------|---------|---------|---------|---------|---------|---------|---------|---------|---------|---------|---------|---------|---------|---------|---------|---------|
| A | 1.9%    | 3.0%    | 3.3%    | 3.3%    | 1.0%    | 3.5%    | 6.7%    | 6.1%    | 5.3%    | 3.8%    | 1.7%    | 2.7%    | 3.0%    | 2.1%    | 2.1%    | 3.2%    | 45.5%   | 2.2%    | 2.7%    |
| C | 0.8%    | 0.9%    | 0.5%    | -       | -       | -       | 0.7%    | -       | 1.6%    | -       | -       | 0.7%    | 0.9%    | 1.1%    | -       | 1.1%    | 1.1%    | 1.5%    | 1.1%    |
| D | 4.0%    | 2.9%    | 6.3%    | 11.7%   | 0.9%    | 3.6%    | 2.4%    | 7.2%    | -       | 11.5%   | -       | 3.3%    | 1.0%    | 2.1%    | 1.3%    | 0.9%    | 1.8%    | 0.5%    | 2.2%    |
| E | 5.9%    | 1.0%    | 7.3%    | 4.1%    | 1.0%    | 10.9%   | 9.9%    | 3.2%    | 3.1%    | 21.7%   | 1.9%    | 11.0%   | 1.3%    | 6.4%    | 3.3%    | 3.1%    | 6.0%    | 3.8%    | 5.9%    |
| F | 1.1%    | 6.1%    | 1.1%    | 0.8%    | 3.2%    | 1.1%    | 1.4%    | 3.0%    | 1.1%    | 0.5%    | 4.4%    | 1.3%    | 24.9%   | 0.8%    | 0.8%    | 11.4%   | -       | 8.2%    | 3.2%    |
| G | 0.6%    | -       | 3.1%    | 38.1%   | -       | 0.9%    | 1.5%    | 41.5%   | 0.8%    | 1.6%    | 1.4%    | 2.6%    | 1.8%    | 2.5%    | 2.8%    | 1.2%    | 5.5%    | 0.9%    | 1.1%    |
| H | 2.0%    | -       | 2.5%    | 2.6%    | -       | 2.3%    | 0.9%    | 2.1%    | 2.2%    | 2.0%    | 2.9%    | 1.8%    | -       | 1.8%    | 0.5%    | 2.9%    | 1.0%    | 1.2%    | 1.1%    |
| I | 4.3%    | 22.4%   | 0.9%    | 0.7%    | 4.5%    | 5.1%    | 1.9%    | 0.5%    | 4.2%    | 1.1%    | 1.2%    | 2.5%    | 18.2%   | 0.9%    | 12.5%   | 3.5%    | 1.1%    | 13.3%   | 2.0%    |
| K | 6.7%    | 0.9%    | 7.4%    | 4.3%    | 0.5%    | 16.6%   | 3.9%    | 2.4%    | 4.5%    | 7.4%    | 1.8%    | 8.4%    | 0.9%    | 6.1%    | 1.6%    | 5.5%    | 3.9%    | 1.1%    | 4.3%    |
| L | 5.7%    | 21.9%   | 1.7%    | 1.2%    | 71.2%   | 5.8%    | 1.9%    | 3.0%    | 11.6%   | 4.8%    | 4.2%    | 6.0%    | 13.9%   | 2.8%    | 15.3%   | 8.2%    | 2.2%    | 12.6%   | 2.7%    |
| M | 1.3%    | 2.0%    | 0.8%    | 0.5%    | 1.8%    | 1.6%    | 0.6%    | 0.6%    | 2.1%    | 0.8%    | 0.8%    | 0.9%    | 2.8%    | 0.7%    | 1.6%    | 1.8%    | 0.5%    | 1.9%    | 0.9%    |
| N | 4.6%    | 1.1%    | 5.3%    | 13.6%   | 0.7%    | 4.0%    | 3.0%    | 10.9%   | 2.7%    | 6.6%    | 1.2%    | 6.9%    | 0.9%    | 4.9%    | 2.4%    | 1.7%    | 2.6%    | 1.1%    | 19.9%   |
| P | 2.5%    | 0.8%    | 4.2%    | 1.9%    | 0.5%    | 1.4%    | 45.8%   | -       | -       | 2.7%    | 1.0%    | 1.9%    | 0.6%    | 1.2%    | 1.4%    | 1.1%    | 3.9%    | 1.0%    | 1.7%    |
| Q | 3.5%    | 1.5%    | 4.7%    | 2.7%    | 0.7%    | 8.3%    | 2.6%    | 1.6%    | 3.2%    | 6.2%    | 0.9%    | 6.4%    | -       | 5.4%    | 0.9%    | 5.2%    | 4.1%    | 0.9%    | 4.1%    |
| R | 6.5%    | 0.8%    | 5.2%    | 3.0%    | 1.3%    | 9.5%    | 2.1%    | 2.3%    | 5.3%    | 4.5%    | 2.2%    | 5.7%    | -       | 21.1%   | 1.1%    | 8.7%    | 4.8%    | 0.9%    | 5.4%    |
| S | 6.1%    | 0.8%    | 17.6%   | 5.4%    | 0.8%    | 7.9%    | 5.0%    | 7.5%    | 5.7%    | 9.2%    | 1.1%    | 10.5%   | 0.7%    | 11.7%   | 1.0%    | 4.7%    | 7.5%    | 1.6%    | 10.1%   |
| T | 31.6%   | 2.3%    | 23.2%   | 2.4%    | 3.3%    | 10.4%   | 6.0%    | 2.6%    | 31.5%   | 11.6%   | 1.4%    | 20.9%   | 1.5%    | 22.4%   | 1.9%    | 4.9%    | 5.0%    | 3.0%    | 24.3%   |
| V | 9.4%    | 28.2%   | 2.4%    | 1.3%    | 6.3%    | 5.3%    | 2.3%    | 0.8%    | 13.1%   | 2.2%    | 2.0%    | 3.9%    | 21.3%   | 1.5%    | 46.6%   | 4.4%    | 1.9%    | 34.7%   | 2.9%    |
| W | -       | -       | 0.7%    | -       | -       | -       | -       | 0.7%    | -       | 0.6%    | 0.5%    | -       | -       | 1.1%    | -       | 2.0%    | -       | 0.8%    | 0.5%    |
| Y | 1.1%    | 2.2%    | 1.9%    | 1.7%    | 0.9%    | 1.4%    | 1.1%    | 3.1%    | 0.7%    | -       | 68.5%   | 2.0%    | 4.5%    | 3.3%    | 2.0%    | 24.5%   | 0.8%    | 8.7%    | 3.9%    |

**Most Frequent**

|   |             |             |             |             |             |             |             |             |             |             |             |             |             |             |             |             |             |             |             |
|---|-------------|-------------|-------------|-------------|-------------|-------------|-------------|-------------|-------------|-------------|-------------|-------------|-------------|-------------|-------------|-------------|-------------|-------------|-------------|
| 1 | T<br>(0.32) | V<br>(0.28) | T<br>(0.23) | G<br>(0.38) | L<br>(0.71) | K<br>(0.17) | P<br>(0.46) | G<br>(0.41) | T<br>(0.31) | E<br>(0.22) | Y<br>(0.69) | T<br>(0.21) | F<br>(0.25) | T<br>(0.22) | V<br>(0.47) | Y<br>(0.25) | A<br>(0.46) | V<br>(0.35) | T<br>(0.24) |
| 2 | V<br>(0.09) | I<br>(0.22) | S<br>(0.18) | N<br>(0.14) | V<br>(0.06) | E<br>(0.11) | E<br>(0.1)  | N<br>(0.11) | V<br>(0.13) | T<br>(0.12) | F<br>(0.04) | E<br>(0.11) | V<br>(0.21) | R<br>(0.21) | L<br>(0.15) | F<br>(0.11) | S<br>(0.07) | I<br>(0.13) | N<br>(0.2)  |
| 3 | K<br>(0.07) | L<br>(0.22) | K<br>(0.07) | D<br>(0.12) | I<br>(0.04) | T<br>(0.1)  | A<br>(0.07) | S<br>(0.08) | L<br>(0.12) | D<br>(0.12) | L<br>(0.04) | S<br>(0.1)  | I<br>(0.18) | S<br>(0.12) | I<br>(0.13) | R<br>(0.09) | E<br>(0.06) | L<br>(0.13) | S<br>(0.1)  |
| 4 | R<br>(0.06) | F<br>(0.06) | E<br>(0.07) | S<br>(0.05) | T<br>(0.03) | R<br>(0.09) | T<br>(0.06) | D<br>(0.07) | S<br>(0.06) | S<br>(0.09) | H<br>(0.03) | K<br>(0.08) | L<br>(0.14) | E<br>(0.06) | E<br>(0.03) | L<br>(0.08) | G<br>(0.05) | Y<br>(0.09) | E<br>(0.06) |

|   | G<br>77 | R<br>78 | G<br>79 | D<br>80 | S<br>81 | P<br>82 | A<br>83 | S<br>84 | S<br>85 | K<br>86 | P<br>87 | I<br>88 | S<br>89 | I<br>90 | N<br>91 | Y<br>92 | R<br>93 | T<br>94 |
|---|---------|---------|---------|---------|---------|---------|---------|---------|---------|---------|---------|---------|---------|---------|---------|---------|---------|---------|
| A | 18.6%   | 6.7%    | 8.8%    | 1.1%    | 8.1%    | 5.6%    | 42.2%   | 10.0%   | 6.6%    | 2.6%    | 8.7%    | 11.4%   | 7.0%    | 6.1%    | 4.8%    | 4.2%    | 8.4%    | 9.4%    |
| C | 0.7%    | -       | 1.1%    | 0.7%    | 2.0%    | 0.8%    | 1.1%    | 2.6%    | 1.0%    | -       | -       | 1.6%    | 0.7%    | 1.0%    | -       | -       | -       | -       |
| D | 2.6%    | 0.6%    | 0.6%    | 22.8%   | 0.7%    | 1.3%    | -       | 1.7%    | 4.3%    | 1.3%    | 2.3%    | 0.7%    | 1.2%    | 3.4%    | 8.8%    | 2.2%    | 2.1%    | 1.0%    |
| E | 5.3%    | 7.6%    | 1.5%    | 17.5%   | 0.8%    | 5.3%    | 2.7%    | 10.2%   | 2.4%    | 19.6%   | 4.3%    | 1.2%    | 1.3%    | 5.3%    | 7.8%    | 10.5%   | 14.6%   | 1.8%    |
| F | 4.5%    | 2.0%    | 4.6%    | 3.5%    | 3.7%    | 2.2%    | 2.6%    | 2.5%    | 1.7%    | 0.5%    | -       | 7.1%    | -       | 4.0%    | -       | 14.1%   | 2.5%    | 0.6%    |
| G | 14.6%   | -       | 49.6%   | 1.1%    | 9.1%    | 2.5%    | 8.6%    | 13.9%   | 23.6%   | 7.0%    | 8.3%    | 4.0%    | 32.0%   | 6.1%    | 36.5%   | 4.7%    | 2.3%    | 2.8%    |
| H | 1.7%    | 3.0%    | 0.8%    | 1.1%    | 0.8%    | 1.2%    | -       | 1.9%    | 0.6%    | 2.2%    | 0.8%    | 0.5%    | -       | -       | 0.6%    | 3.4%    | 1.0%    | -       |
| I | 2.9%    | 2.3%    | 2.1%    | 4.3%    | 3.4%    | 6.5%    | 5.8%    | 1.8%    | 1.3%    | 0.7%    | 2.4%    | 13.2%   | -       | 14.8%   | -       | 1.3%    | -       | 1.1%    |
| K | 4.9%    | 13.9%   | 0.8%    | 2.8%    | 3.9%    | 5.6%    | 1.0%    | 3.4%    | 1.0%    | 21.3%   | 1.7%    | 2.0%    | 0.8%    | 1.3%    | 2.7%    | 4.1%    | 9.0%    | 1.0%    |
| L | 2.8%    | 3.0%    | 2.3%    | 4.0%    | 2.5%    | 4.0%    | 6.7%    | 2.7%    | 1.2%    | 1.9%    | 0.6%    | 14.2%   | -       | 15.4%   | 0.7%    | 4.4%    | 1.6%    | 2.1%    |
| M | 1.5%    | 1.1%    | 1.2%    | 0.6%    | 1.0%    | 3.2%    | 2.3%    | 0.8%    | -       | 0.6%    | -       | 3.7%    | -       | 2.5%    | -       | 1.2%    | -       | 0.5%    |
| N | 7.6%    | 1.7%    | 5.5%    | 13.4%   | 6.4%    | 1.7%    | 1.4%    | 5.0%    | 15.6%   | 10.2%   | 3.3%    | 1.1%    | 2.5%    | 0.9%    | 11.5%   | 1.1%    | 1.0%    | 0.7%    |
| P | 3.4%    | -       | 1.0%    | -       | -       | 23.6%   | -       | -       | -       | 0.5%    | 55.1%   | 0.6%    | -       | 2.0%    | 3.5%    | 11.1%   | 19.0%   | 6.4%    |
| Q | 3.3%    | 5.2%    | 1.4%    | 4.7%    | 3.0%    | 5.4%    | 1.6%    | 4.9%    | 2.0%    | 9.7%    | 1.8%    | 1.2%    | 1.2%    | 1.4%    | 2.6%    | 2.2%    | 5.4%    | 0.8%    |
| R | 1.9%    | 31.2%   | 0.8%    | 5.7%    | 7.4%    | 8.2%    | 2.6%    | 5.7%    | 1.4%    | 12.1%   | 1.3%    | 0.8%    | 1.0%    | 1.3%    | 1.4%    | 1.9%    | 16.3%   | 0.5%    |
| S | 7.6%    | 1.7%    | 3.5%    | 1.7%    | 19.4%   | 2.0%    | 1.2%    | 15.8%   | 21.7%   | 2.8%    | 2.9%    | 0.7%    | 45.9%   | 2.5%    | 14.9%   | 5.0%    | 7.6%    | 55.5%   |
| T | 3.0%    | 2.5%    | 3.7%    | 3.0%    | 11.4%   | 4.3%    | 1.6%    | 7.7%    | 7.9%    | 3.0%    | 3.0%    | 2.6%    | 4.5%    | 4.2%    | 2.8%    | 1.6%    | 3.0%    | 13.0%   |
| V | 6.8%    | 5.4%    | 3.1%    | 7.2%    | 12.0%   | 12.7%   | 13.6%   | 4.9%    | 4.7%    | 1.3%    | 1.8%    | 24.1%   | -       | 22.6%   | -       | 3.5%    | 0.8%    | 1.4%    |
| W | 0.6%    | -       | 0.5%    | -       | -       | -       | 0.7%    | -       | -       | -       | -       | 1.4%    | -       | 2.1%    | -       | 9.5%    | 2.3%    | -       |
| Y | 5.7%    | 10.9%   | 7.1%    | 3.7%    | 4.3%    | 3.3%    | 3.2%    | 4.0%    | 2.1%    | 2.1%    | 0.6%    | 7.8%    | -       | 2.6%    | -       | 13.6%   | 1.8%    | -       |

**Most Frequent**

|   |             |             |             |             |             |             |             |             |             |             |             |             |             |             |             |             |             |             |
|---|-------------|-------------|-------------|-------------|-------------|-------------|-------------|-------------|-------------|-------------|-------------|-------------|-------------|-------------|-------------|-------------|-------------|-------------|
| 1 | A<br>(0.19) | R<br>(0.31) | G<br>(0.5)  | D<br>(0.23) | S<br>(0.19) | P<br>(0.24) | A<br>(0.42) | S<br>(0.16) | G<br>(0.24) | K<br>(0.21) | P<br>(0.55) | V<br>(0.24) | S<br>(0.46) | V<br>(0.23) | G<br>(0.37) | F<br>(0.14) | P<br>(0.19) | S<br>(0.55) |
| 2 | G<br>(0.15) | K<br>(0.14) | A<br>(0.09) | E<br>(0.18) | V<br>(0.12) | V<br>(0.13) | V<br>(0.14) | G<br>(0.14) | S<br>(0.22) | E<br>(0.2)  | A<br>(0.09) | L<br>(0.14) | G<br>(0.32) | L<br>(0.15) | S<br>(0.15) | Y<br>(0.14) | R<br>(0.16) | T<br>(0.13) |
| 3 | N<br>(0.08) | Y<br>(0.11) | Y<br>(0.07) | N<br>(0.13) | T<br>(0.11) | R<br>(0.08) | G<br>(0.09) | E<br>(0.1)  | N<br>(0.16) | R<br>(0.12) | G<br>(0.08) | I<br>(0.13) | A<br>(0.07) | I<br>(0.15) | N<br>(0.11) | P<br>(0.11) | E<br>(0.15) | A<br>(0.09) |
| 4 | S<br>(0.08) | E<br>(0.08) | N<br>(0.06) | V<br>(0.07) | G<br>(0.09) | I<br>(0.07) | L<br>(0.07) | A<br>(0.1)  | T<br>(0.08) | N<br>(0.1)  | E<br>(0.04) | A<br>(0.11) | T<br>(0.04) | A<br>(0.06) | D<br>(0.09) | E<br>(0.11) | K<br>(0.09) | P<br>(0.06) |



C. Complementarity distribution mimicking CDRH3 of antibodies (CDR'), modified from previous work (Hackel et al., 2010).

CDR' amino acid frequency distribution:

|   |      |
|---|------|
| A | 0.06 |
| C | 0.05 |
| D | 0.11 |
| E | 0.02 |
| F | 0.03 |
| G | 0.04 |
| H | 0.06 |
| I | 0.02 |
| K | 0.02 |
| L | 0.02 |
| M | 0.00 |
| N | 0.09 |
| P | 0.04 |
| Q | 0.01 |
| R | 0.03 |
| S | 0.13 |
| T | 0.05 |
| V | 0.03 |
| W | 0.01 |
| Y | 0.17 |
| Z | 0.03 |

Nucleotide composition of codon design:

| A1   | C1   | G1   | T1   | A2   | C2   | G2   | T2   | A3   | C3   | G3   | T3   |
|------|------|------|------|------|------|------|------|------|------|------|------|
| 0.20 | 0.15 | 0.25 | 0.40 | 0.50 | 0.25 | 0.15 | 0.10 | 0.00 | 0.45 | 0.10 | 0.45 |

D. Target exposure and solvent exposed surface area (SASA) for the BC, DE, and FG loops of fibronectin.

| <b>Position</b> | <b>Target Exposure</b> | <b>SASA</b> |
|-----------------|------------------------|-------------|
| D23             | 0.68                   | 0.35        |
| A24             | 0.90                   | 0.32        |
| P25             | 0.70                   | 0.10        |
| A26             | 0.79                   | 0.75        |
| V27             | 0.69                   | 0.57        |
| T28             | 0.84                   | 0.75        |
| V29             | 0.46                   | 0.03        |
| R30             | 0.90                   | 0.49        |
| Y31             | 0.37                   | 0.43        |
| G52             | 0.54                   | 0.12        |
| S53             | 0.94                   | 0.83        |
| K54             | 0.68                   | 0.64        |
| S55             | 0.85                   | 0.41        |
| T56             | 0.93                   | 0.48        |
| T76             | 0.39                   | 0.08        |
| G77             | 0.60                   | 0.48        |
| R78             | 0.79                   | 0.81        |
| G79             | 0.72                   | 0.77        |
| D80             | 0.70                   | 0.74        |
| S81             | 0.54                   | 0.69        |
| P82             | 0.59                   | 0.76        |
| A83             | 0.76                   | 0.81        |
| S84             | 0.52                   | 0.54        |
| S85             | 0.61                   | 0.14        |
| K86             | 0.58                   | 0.88        |
