# Supplementary material for: High-Throughput Ligand Discovery Reveals a Sitewise Gradient of Diversity in Broadly Evolved Hydrophilic Fibronectin Domains
Source: PubMed Central journal article supplement (PMC4575168; doi:10.1371/journal.pone.0138956), 2015-09-18
Supplement: pone.0138956.s007.pdf [file pone.0138956.s007.pdf]

**S4 Table. Illumina primer design.** Conserved framework positions with regions or sites having low diversity, as is the case with conserved framework positions, require additional considerations during sample preparation to ensure a high level of accuracy during the MiSeq run. The inclusion of variable length degenerate sequence ( $N_{4-8}$ ) at 5' and 3' ends allow the conserved sites to be offset. Based on TruSeq guidelines, adapter indices are designed to have balanced G/T and C/A content, the following 6 adapter index tags were selected: AD005,6,12,14,18,19. Schematic below demonstrates the two-step PCR used for amplicon library construction. Colored regions of schematic indicate (from left to right) TruSeq universal adapter (red), target primer (cyan), gene of interest (gray), reverse target primer (green), multiplex primer 2.0 (yellow), Illumina index (blue), and Illumina PCR primer (purple). Table at bottom lists individual sequences with item names corresponding to PCR schematic.

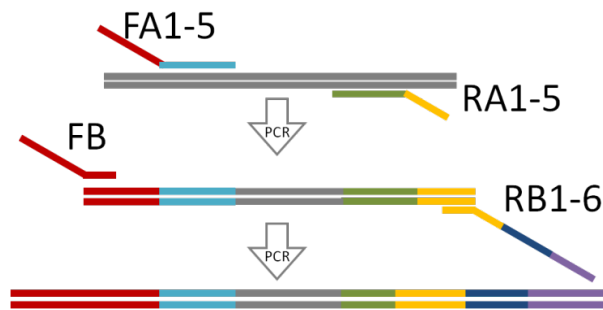

| Item Name | Length | Sequence                                                                                                      |
|-----------|--------|---------------------------------------------------------------------------------------------------------------|
| RB1       | 59     | caagcagaagacggcatacagagat <b>CACTGT</b> gtgactggagttcagacgtgtgctcttcc                                         |
| RB2       | 59     | caagcagaagacggcatacagagat <b>ATTGGC</b> gtgactggagttcagacgtgtgctcttcc                                         |
| RB3       | 59     | caagcagaagacggcatacagagat <b>TACAAG</b> gtgactggagttcagacgtgtgctcttcc                                         |
| RB4       | 59     | caagcagaagacggcatacagagat <b>TTTCAC</b> gtgactggagttcagacgtgtgctcttcc                                         |
| RB5       | 59     | caagcagaagacggcatacagagat <b>GGAAC</b> Tgtgactggagttcagacgtgtgctcttcc                                         |
| RB6       | 59     | caagcagaagacggcatacagagat <b>GCGGAC</b> gtgactggagttcagacgtgtgctcttcc                                         |
| FB        | 51     | aatgatacggcgaccaccgagatctacactctttccctacacgacgctctt                                                           |
| RA1       | 49     | G TTCAGACGTGTGCTCTTCCGATCTN N N N N N A A A G C T T T T G T T C G G A T C C                                   |
| RA2       | 50     | G TTCAGACGTGTGCTCTTCCGATCTN N N N N N A A A G C T T T T G T T C G G A T C C                                   |
| RA3       | 51     | G TTCAGACGTGTGCTCTTCCGATCTN N N N N N N A A A G C T T T T G T T C G G A T C C                                 |
| RA4       | 52     | G TTCAGACGTGTGCTCTTCCGATCTN N N N N N N N A A A G C T T T T G T T C G G A T C C                               |
| RA5       | 53     | G TTCAGACGTGTGCTCTTCCGATCTN N N N N N N N N A A A G C T T T T G T T C G G A T C C                             |
| FA1       | 51     | T T T C C C T A C A C G A C G C T C T T C C G A T C T N N N N N A C T A C G C T C T G C A G G C T A G T       |
| FA2       | 52     | T T T C C C T A C A C G A C G C T C T T C C G A T C T N N N N N A C T A C G C T C T G C A G G C T A G T       |
| FA3       | 53     | T T T C C C T A C A C G A C G C T C T T C C G A T C T N N N N N N A C T A C G C T C T G C A G G C T A G T     |
| FA4       | 54     | T T T C C C T A C A C G A C G C T C T T C C G A T C T N N N N N N N A C T A C G C T C T G C A G G C T A G T   |
| FA5       | 55     | T T T C C C T A C A C G A C G C T C T T C C G A T C T N N N N N N N N A C T A C G C T C T G C A G G C T A G T |

TruSeq guidelines PDF available online: [http://support.illumina.com/content/dam/illumina-support/documents/myillumina/f5f619d3-2c4c-489b-80a3-e0414baa4e89/truseq\\_dna\\_sampleprep\\_guide\\_15026486\\_c.pdf](http://support.illumina.com/content/dam/illumina-support/documents/myillumina/f5f619d3-2c4c-489b-80a3-e0414baa4e89/truseq_dna_sampleprep_guide_15026486_c.pdf)
